# Supplementary material for: Design, Synthesis and Antitumor Activity Evaluation in Vitro of Novel 1,6-Naphthyridine Derivatives
Source: Research Square preprint supplement (doi:10.21203/rs.3.rs-8736347/v1), 2026-02-17
Supplement: Supplementary file 1 [file 2edb6020a7bd971c65e82e98.docx]

**Design, Synthesis and Antitumor Activity Evaluation *in Vitro* of**

**Novel 1,6-Naphthyridine Derivatives**

Xiao-Jie Si 1, Xin-Yi Ma 2, Su-Lin Zhang 2, Ming-Yue Zheng 2, Motahareh Asgari 1*, Chen-Guo Feng 1*

- Motahareh Asgari

motahareh_asgari@shutcm.edu.cn

- Chenguo Feng

[fengcg@shutcm.edu.cn](mailto:fengcg@shutcm.edu.cn)

1 The Research Center of Chiral Drugs, Shanghai Frontiers Science Center for TCM Chemical Biology, Innovation Research Institute of Traditional Chinese Medicine, Shanghai University of Traditional Chinese Medicine, Shanghai, 201203, China.

2 Drug Discovery and Design Center, State Key Laboratory of Drug Research, Shanghai Institute of Materia Medica, Chinese Academy of Sciences, 555 Zuchongzhi Road, Shanghai 201203, China.


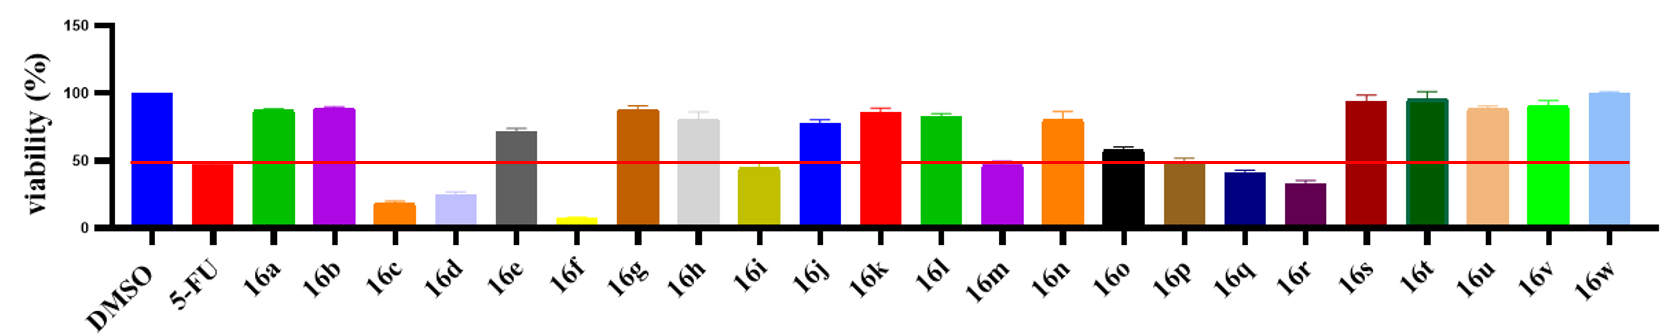
**Fig. S1** The inhibitory activity of the compounds (**16a–16w**) against HepG2 cells


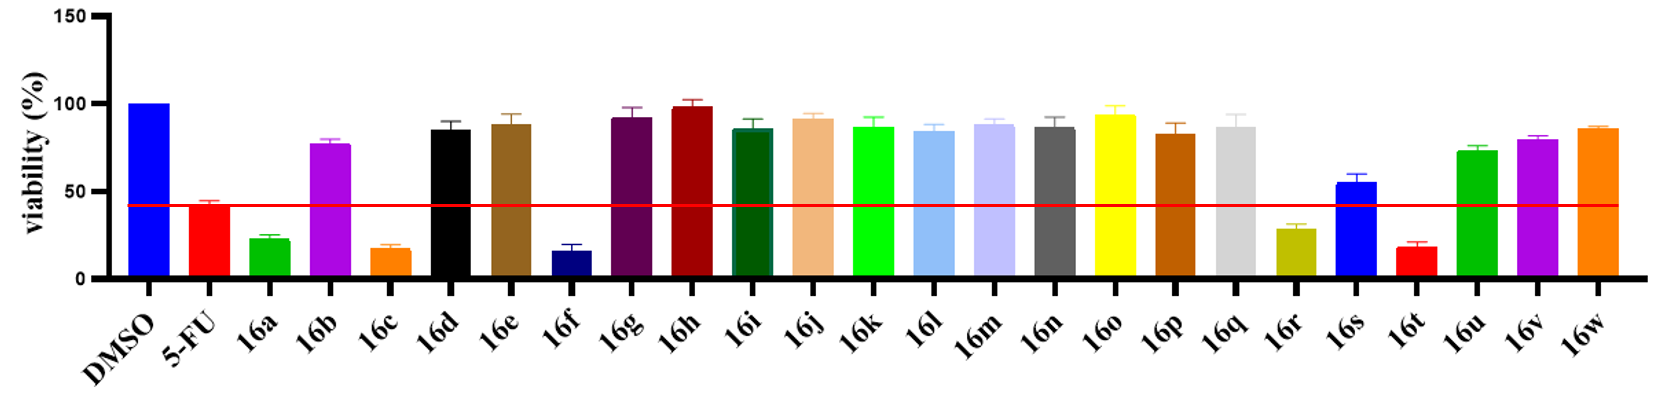


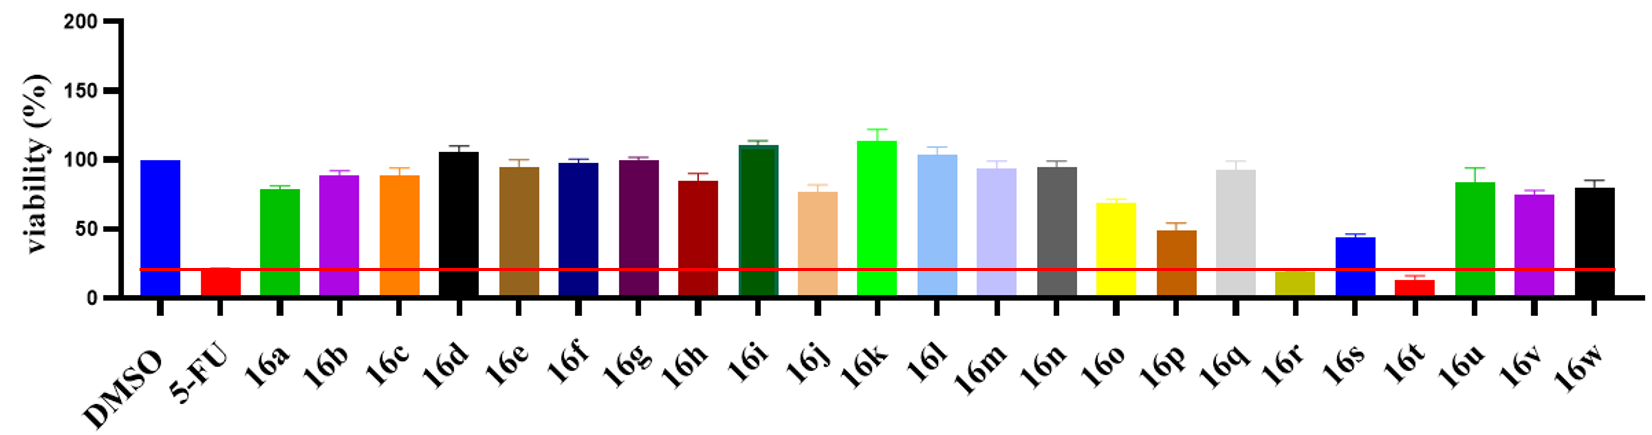
**Fig. S2** The inhibitory activity of the compounds (**16a–16w**) against MCF-7 cells


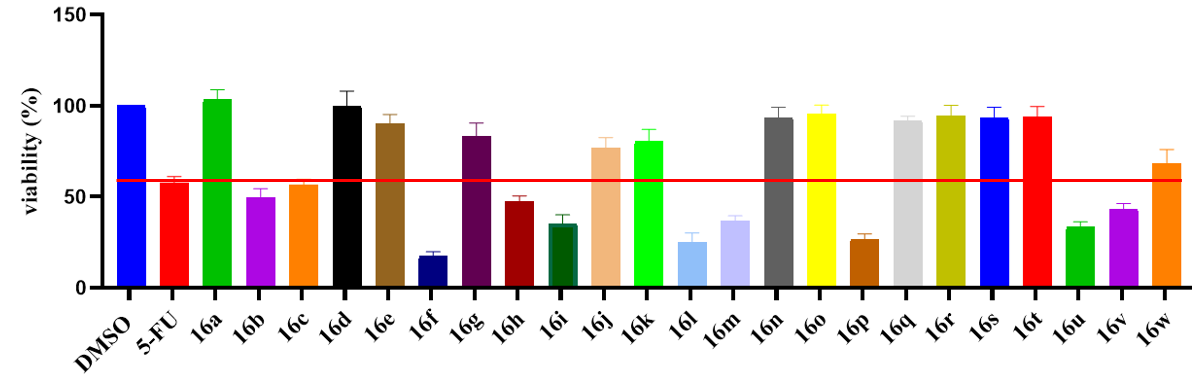
**Fig. S3** The inhibitory activity of the compounds (**16a–16w**) against NCI-H1650 cells

**Fig. S4** The inhibitory activity of the compounds (**16a–16w**) against U87MG cells


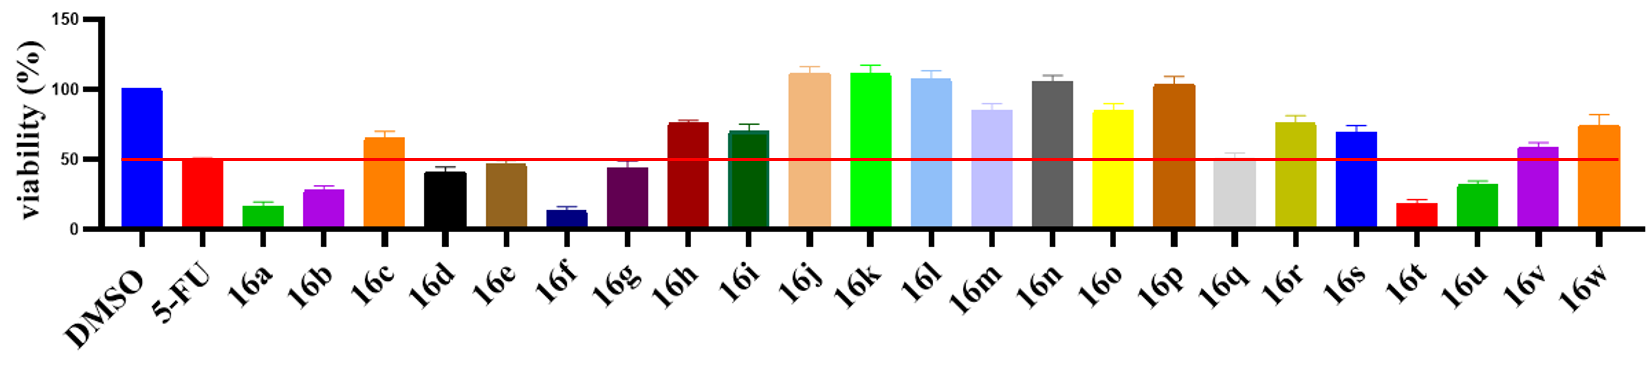
**Fig. S5** The inhibitory activity of the compounds (**16a–16w**) against A549 cells
