# Supplementary material for: Design, Synthesis and Antitumor Activity Evaluation in Vitro of Novel 1,6-Naphthyridine Derivatives
Source: Research Square preprint supplement (doi:10.21203/rs.3.rs-8736347/v1), 2026-02-17
Supplement: Supplementary file 2 [file 84581aa2adf4e38d6ea0fe7a.docx]

**Design, Synthesis and Antitumor Activity Evaluation *in Vitro* of**

**Novel 1,6-Naphthyridine Derivatives**

Xiao-Jie Si 1, Xin-Yi Ma 2, Su-Lin Zhang 2, Ming-Yue Zheng 2, Motahareh Asgari 1*, Chen-Guo Feng 1*

- Motahareh Asgari

motahareh_asgari@shutcm.edu.cn

- Chenguo Feng

[fengcg@shutcm.edu.cn](mailto:fengcg@shutcm.edu.cn)

1 The Research Center of Chiral Drugs, Shanghai Frontiers Science Center for TCM Chemical Biology, Innovation Research Institute of Traditional Chinese Medicine, Shanghai University of Traditional Chinese Medicine, Shanghai, 201203, China.

2 Drug Discovery and Design Center, State Key Laboratory of Drug Research, Shanghai Institute of Materia Medica, Chinese Academy of Sciences, 555 Zuchongzhi Road, Shanghai 201203, China.

**Support information**

**Content**

[1H NMR Spectra of compound **16a** 4](file:///D:\硕士\硕士期间的零碎\论文文献\药物化学研究\Support%20information.doc#_Toc2218)

[13C NMR Spectra of compound **16a** 4](file:///D:\硕士\硕士期间的零碎\论文文献\药物化学研究\Support%20information.doc#_Toc5930)

[1H NMR Spectra of compound **16b** 5](file:///D:\硕士\硕士期间的零碎\论文文献\药物化学研究\Support%20information.doc#_Toc2218)

[13C NMR Spectra of compound **16b** 5](file:///D:\硕士\硕士期间的零碎\论文文献\药物化学研究\Support%20information.doc#_Toc5930)

[1H NMR Spectra of compound **16c** 6](file:///D:\硕士\硕士期间的零碎\论文文献\药物化学研究\Support%20information.doc#_Toc2218)

[13C NMR Spectra of compound **16c** 6](file:///D:\硕士\硕士期间的零碎\论文文献\药物化学研究\Support%20information.doc#_Toc5930)

[1H NMR Spectra of compound **16d** 7](file:///D:\硕士\硕士期间的零碎\论文文献\药物化学研究\Support%20information.doc#_Toc2218)

[13C NMR Spectra of compound **16d** 7](file:///D:\硕士\硕士期间的零碎\论文文献\药物化学研究\Support%20information.doc#_Toc5930)

[1H NMR Spectra of compound **16e** 8](file:///D:\硕士\硕士期间的零碎\论文文献\药物化学研究\Support%20information.doc#_Toc2218)

[13C NMR Spectra of compound **16e** 8](file:///D:\硕士\硕士期间的零碎\论文文献\药物化学研究\Support%20information.doc#_Toc5930)

[1H NMR Spectra of compound **16f** 9](file:///D:\硕士\硕士期间的零碎\论文文献\药物化学研究\Support%20information.doc#_Toc2218)

[13C NMR Spectra of compound **16f** 9](file:///D:\硕士\硕士期间的零碎\论文文献\药物化学研究\Support%20information.doc#_Toc5930)

[1H NMR Spectra of compound **16g** 10](file:///D:\硕士\硕士期间的零碎\论文文献\药物化学研究\Support%20information.doc#_Toc2218)

[13C NMR Spectra of compound **16g** 10](file:///D:\硕士\硕士期间的零碎\论文文献\药物化学研究\Support%20information.doc#_Toc5930)

[1H NMR Spectra of compound **16h** 11](file:///D:\硕士\硕士期间的零碎\论文文献\药物化学研究\Support%20information.doc#_Toc2218)

[13C NMR Spectra of compound **16h** 11](file:///D:\硕士\硕士期间的零碎\论文文献\药物化学研究\Support%20information.doc#_Toc5930)

[1H NMR Spectra of compound **16i** 12](file:///D:\硕士\硕士期间的零碎\论文文献\药物化学研究\Support%20information.doc#_Toc2218)

[13C NMR Spectra of compound **16i** 12](file:///D:\硕士\硕士期间的零碎\论文文献\药物化学研究\Support%20information.doc#_Toc5930)

[1H NMR Spectra of compound **16j** 13](file:///D:\硕士\硕士期间的零碎\论文文献\药物化学研究\Support%20information.doc#_Toc2218)

[13C NMR Spectra of compound **16j** 13](file:///D:\硕士\硕士期间的零碎\论文文献\药物化学研究\Support%20information.doc#_Toc5930)

[1H NMR Spectra of compound **16k** 14](file:///D:\硕士\硕士期间的零碎\论文文献\药物化学研究\Support%20information.doc#_Toc2218)

[13C NMR Spectra of compound **16k** 14](file:///D:\硕士\硕士期间的零碎\论文文献\药物化学研究\Support%20information.doc#_Toc5930)

[1H NMR Spectra of compound **16l** 15](file:///D:\硕士\硕士期间的零碎\论文文献\药物化学研究\Support%20information.doc#_Toc2218)

[13C NMR Spectra of compound **16l** 15](file:///D:\硕士\硕士期间的零碎\论文文献\药物化学研究\Support%20information.doc#_Toc5930)

[1H NMR Spectra of compound **16m** 16](file:///D:\硕士\硕士期间的零碎\论文文献\药物化学研究\Support%20information.doc#_Toc2218)

[13C NMR Spectra of compound **16m** 16](file:///D:\硕士\硕士期间的零碎\论文文献\药物化学研究\Support%20information.doc#_Toc5930)

[1H NMR Spectra of compound **16n** 17](file:///D:\硕士\硕士期间的零碎\论文文献\药物化学研究\Support%20information.doc#_Toc2218)

[13C NMR Spectra of compound **16n** 17](file:///D:\硕士\硕士期间的零碎\论文文献\药物化学研究\Support%20information.doc#_Toc5930)

[1H NMR Spectra of compound **16o** 18](file:///D:\硕士\硕士期间的零碎\论文文献\药物化学研究\Support%20information.doc#_Toc2218)

[13C NMR Spectra of compound **16o** 18](file:///D:\硕士\硕士期间的零碎\论文文献\药物化学研究\Support%20information.doc#_Toc5930)

[1H NMR Spectra of compound **16p** 19](file:///D:\硕士\硕士期间的零碎\论文文献\药物化学研究\Support%20information.doc#_Toc2218)

[13C NMR Spectra of compound **16p** 19](file:///D:\硕士\硕士期间的零碎\论文文献\药物化学研究\Support%20information.doc#_Toc5930)

[1H NMR Spectra of compound **16q** 20](file:///D:\硕士\硕士期间的零碎\论文文献\药物化学研究\Support%20information.doc#_Toc2218)

[13C NMR Spectra of compound **16q** 20](file:///D:\硕士\硕士期间的零碎\论文文献\药物化学研究\Support%20information.doc#_Toc5930)

[1H NMR Spectra of compound **16r** 21](file:///D:\硕士\硕士期间的零碎\论文文献\药物化学研究\Support%20information.doc#_Toc2218)

[13C NMR Spectra of compound **16r** 21](file:///D:\硕士\硕士期间的零碎\论文文献\药物化学研究\Support%20information.doc#_Toc5930)

[1H NMR Spectra of compound **16s** 22](file:///D:\硕士\硕士期间的零碎\论文文献\药物化学研究\Support%20information.doc#_Toc2218)

[13C NMR Spectra of compound **16s** 22](file:///D:\硕士\硕士期间的零碎\论文文献\药物化学研究\Support%20information.doc#_Toc5930)

[1H NMR Spectra of compound **16t** 23](file:///D:\硕士\硕士期间的零碎\论文文献\药物化学研究\Support%20information.doc#_Toc2218)

[13C NMR Spectra of compound **16t** 23](file:///D:\硕士\硕士期间的零碎\论文文献\药物化学研究\Support%20information.doc#_Toc5930)

[1H NMR Spectra of compound **16u** 24](file:///D:\硕士\硕士期间的零碎\论文文献\药物化学研究\Support%20information.doc#_Toc2218)

[13C NMR Spectra of compound **16u** 24](file:///D:\硕士\硕士期间的零碎\论文文献\药物化学研究\Support%20information.doc#_Toc5930)

[1H NMR Spectra of compound **16v** 25](file:///D:\硕士\硕士期间的零碎\论文文献\药物化学研究\Support%20information.doc#_Toc2218)

[13C NMR Spectra of compound **16v** 25](file:///D:\硕士\硕士期间的零碎\论文文献\药物化学研究\Support%20information.doc#_Toc5930)

[1H NMR Spectra of compound **16w** 26](file:///D:\硕士\硕士期间的零碎\论文文献\药物化学研究\Support%20information.doc#_Toc2218)

[13C NMR Spectra of compound **16w** 26](file:///D:\硕士\硕士期间的零碎\论文文献\药物化学研究\Support%20information.doc#_Toc5930)

**Fig. S1**  [1H NMR Spectra of compound **16a**](file:///D:\硕士\硕士期间的零碎\论文文献\药物化学研究\Support%20information.doc#_Toc2218)

**Fig. S2**  [13C NMR Spectra of compound **16a**](file:///D:\硕士\硕士期间的零碎\论文文献\药物化学研究\Support%20information.doc#_Toc5930)

**Fig. S3**  [1H NMR Spectra of compound **16b**](file:///D:\硕士\硕士期间的零碎\论文文献\药物化学研究\Support%20information.doc#_Toc2218)

**Fig. S4**  [13C NMR Spectra of compound **16b**](file:///D:\硕士\硕士期间的零碎\论文文献\药物化学研究\Support%20information.doc#_Toc5930)

**Fig. S5**  [1H NMR Spectra of compound **16c**](file:///D:\硕士\硕士期间的零碎\论文文献\药物化学研究\Support%20information.doc#_Toc2218)

**Fig. S6**  [13C NMR Spectra of compound **16c**](file:///D:\硕士\硕士期间的零碎\论文文献\药物化学研究\Support%20information.doc#_Toc2218)

**Fig. S7**  [1H NMR Spectra of compound **16d**](file:///D:\硕士\硕士期间的零碎\论文文献\药物化学研究\Support%20information.doc#_Toc2218)

**Fig. S8**  [13C NMR Spectra of compound **16d**](file:///D:\硕士\硕士期间的零碎\论文文献\药物化学研究\Support%20information.doc#_Toc2218)

**Fig. S9**  [1H NMR Spectra of compound **16e**](file:///D:\硕士\硕士期间的零碎\论文文献\药物化学研究\Support%20information.doc#_Toc2218)

**Fig. S10**  [13C NMR Spectra of compound **16e**](file:///D:\硕士\硕士期间的零碎\论文文献\药物化学研究\Support%20information.doc#_Toc2218)

**Fig. S11**  [1H NMR Spectra of compound **16f**](file:///D:\硕士\硕士期间的零碎\论文文献\药物化学研究\Support%20information.doc#_Toc2218)

**Fig. S12**  [13C NMR Spectra of compound **16f**](file:///D:\硕士\硕士期间的零碎\论文文献\药物化学研究\Support%20information.doc#_Toc2218)

**Fig. S13**  [1H NMR Spectra of compound **16g**](file:///D:\硕士\硕士期间的零碎\论文文献\药物化学研究\Support%20information.doc#_Toc2218)

**Fig. S14** [13C NMR Spectra of compound **16g**](file:///D:\硕士\硕士期间的零碎\论文文献\药物化学研究\Support%20information.doc#_Toc2218)

**Fig. S15**  [1H NMR Spectra of compound **16h**](file:///D:\硕士\硕士期间的零碎\论文文献\药物化学研究\Support%20information.doc#_Toc2218)

**Fig. S16**  [13C NMR Spectra of compound **16h**](file:///D:\硕士\硕士期间的零碎\论文文献\药物化学研究\Support%20information.doc#_Toc2218)

**Fig. S17**  [1H NMR Spectra of compound **16i**](file:///D:\硕士\硕士期间的零碎\论文文献\药物化学研究\Support%20information.doc#_Toc2218)

**Fig. S18**  [13C NMR Spectra of compound **16i**](file:///D:\硕士\硕士期间的零碎\论文文献\药物化学研究\Support%20information.doc#_Toc2218)

**Fig. S19**  [1H NMR Spectra of compound **16j**](file:///D:\硕士\硕士期间的零碎\论文文献\药物化学研究\Support%20information.doc#_Toc2218)

**Fig. S20**  [13C NMR Spectra of compound **16j**](file:///D:\硕士\硕士期间的零碎\论文文献\药物化学研究\Support%20information.doc#_Toc2218)

**Fig. S21**  [1H NMR Spectra of compound **16k**](file:///D:\硕士\硕士期间的零碎\论文文献\药物化学研究\Support%20information.doc#_Toc2218)

**Fig. S22**  [13C NMR Spectra of compound **16k**](file:///D:\硕士\硕士期间的零碎\论文文献\药物化学研究\Support%20information.doc#_Toc2218)

**Fig. S23**  [1H NMR Spectra of compound **16l**](file:///D:\硕士\硕士期间的零碎\论文文献\药物化学研究\Support%20information.doc#_Toc2218)

**Fig. S24**  [13C NMR Spectra of compound **16l**](file:///D:\硕士\硕士期间的零碎\论文文献\药物化学研究\Support%20information.doc#_Toc2218)

**Fig. S25**  [1H NMR Spectra of compound **16m**](file:///D:\硕士\硕士期间的零碎\论文文献\药物化学研究\Support%20information.doc#_Toc2218)

**Fig. S26**  [13C NMR Spectra of compound **16m**](file:///D:\硕士\硕士期间的零碎\论文文献\药物化学研究\Support%20information.doc#_Toc2218)

**Fig. S27**  [1H NMR Spectra of compound **16n**](file:///D:\硕士\硕士期间的零碎\论文文献\药物化学研究\Support%20information.doc#_Toc2218)

**Fig. S28**  [13C NMR Spectra of compound **16n**](file:///D:\硕士\硕士期间的零碎\论文文献\药物化学研究\Support%20information.doc#_Toc2218)

**Fig. S31**  [1H NMR Spectra of compound **16o**](file:///D:\硕士\硕士期间的零碎\论文文献\药物化学研究\Support%20information.doc#_Toc2218)

**Fig. S32**  [13C NMR Spectra of compound **16o**](file:///D:\硕士\硕士期间的零碎\论文文献\药物化学研究\Support%20information.doc#_Toc2218)

**Fig. S33**  [1H NMR Spectra of compound **16p**](file:///D:\硕士\硕士期间的零碎\论文文献\药物化学研究\Support%20information.doc#_Toc2218)

**Fig. S34**  [13C NMR Spectra of compound **16p**](file:///D:\硕士\硕士期间的零碎\论文文献\药物化学研究\Support%20information.doc#_Toc2218)

**Fig. S35**  [1H NMR Spectra of compound **16q**](file:///D:\硕士\硕士期间的零碎\论文文献\药物化学研究\Support%20information.doc#_Toc2218)

**Fig. S36**  [13C NMR Spectra of compound **16q**](file:///D:\硕士\硕士期间的零碎\论文文献\药物化学研究\Support%20information.doc#_Toc2218)

**Fig. S37**  [1H NMR Spectra of compound **16r**](file:///D:\硕士\硕士期间的零碎\论文文献\药物化学研究\Support%20information.doc#_Toc2218)

**Fig. S38**  [13C NMR Spectra of compound **16r**](file:///D:\硕士\硕士期间的零碎\论文文献\药物化学研究\Support%20information.doc#_Toc2218)

**Fig. S39**  [1H NMR Spectra of compound **16s**](file:///D:\硕士\硕士期间的零碎\论文文献\药物化学研究\Support%20information.doc#_Toc2218)

**Fig. S40**  [13C NMR Spectra of compound **16s**](file:///D:\硕士\硕士期间的零碎\论文文献\药物化学研究\Support%20information.doc#_Toc2218)

**Fig. S41**  [1H NMR Spectra of compound **16t**](file:///D:\硕士\硕士期间的零碎\论文文献\药物化学研究\Support%20information.doc#_Toc2218)

**Fig. S42**  [13C NMR Spectra of compound **16t**](file:///D:\硕士\硕士期间的零碎\论文文献\药物化学研究\Support%20information.doc#_Toc2218)

**Fig. S43**  [1H NMR Spectra of compound **16u**](file:///D:\硕士\硕士期间的零碎\论文文献\药物化学研究\Support%20information.doc#_Toc2218)

**Fig. S44**  [13C NMR Spectra of compound **16u**](file:///D:\硕士\硕士期间的零碎\论文文献\药物化学研究\Support%20information.doc#_Toc2218)

**Fig. S45**  [1H NMR Spectra of compound **16v**](file:///D:\硕士\硕士期间的零碎\论文文献\药物化学研究\Support%20information.doc#_Toc2218)

**Fig. S46**  [13C NMR Spectra of compound **16v**](file:///D:\硕士\硕士期间的零碎\论文文献\药物化学研究\Support%20information.doc#_Toc2218)

**Fig. S47**  [1H NMR Spectra of compound **16w**](file:///D:\硕士\硕士期间的零碎\论文文献\药物化学研究\Support%20information.doc#_Toc2218)

**Fig. S48**  [13C NMR Spectra of compound **16w**](file:///D:\硕士\硕士期间的零碎\论文文献\药物化学研究\Support%20information.doc#_Toc2218)
