# Supplementary material for: Design, Synthesis and Antitumor Activity Evaluation in Vitro of Novel 1,6-Naphthyridine Derivatives
Source: Research Square preprint supplement (doi:10.21203/rs.3.rs-8736347/v1), 2026-02-17
Supplement: Supplementary file 3 [file ca049a50aabe902998cd8180.docx]

**Design, Synthesis and Antitumor Activity Evaluation *in Vitro* of**

**Novel 1,6-Naphthyridine Derivatives**

Xiao-Jie Si 1, Xin-Yi Ma 2, Su-Lin Zhang 2, Ming-Yue Zheng 2, Motahareh Asgari 1*, Chen-Guo Feng 1*

- Motahareh Asgari

motahareh_asgari@shutcm.edu.cn

- Chenguo Feng

[fengcg@shutcm.edu.cn](mailto:fengcg@shutcm.edu.cn)

1 The Research Center of Chiral Drugs, Shanghai Frontiers Science Center for TCM Chemical Biology, Innovation Research Institute of Traditional Chinese Medicine, Shanghai University of Traditional Chinese Medicine, Shanghai, 201203, China.

2 Drug Discovery and Design Center, State Key Laboratory of Drug Research, Shanghai Institute of Materia Medica, Chinese Academy of Sciences, 555 Zuchongzhi Road, Shanghai 201203, China.

**Support information**

**Content**

[HRMS Spectra of compound **16a** 3](file:///D:\硕士\硕士期间的零碎\论文文献\药物化学研究\Support%20information.doc#_Toc2218)

[HRMS Spectra of compound **16b** 3](file:///D:\硕士\硕士期间的零碎\论文文献\药物化学研究\Support%20information.doc#_Toc5930)

[HRMS Spectra of compound **16c** 3](file:///D:\硕士\硕士期间的零碎\论文文献\药物化学研究\Support%20information.doc#_Toc4150)

[HRMS Spectra of compound **16d** 4](file:///D:\硕士\硕士期间的零碎\论文文献\药物化学研究\Support%20information.doc#_Toc11413)

[HRMS Spectra of compound **16e** 4](file:///D:\硕士\硕士期间的零碎\论文文献\药物化学研究\Support%20information.doc#_Toc25907)

[HRMS Spectra of compound **16f** 4](file:///D:\硕士\硕士期间的零碎\论文文献\药物化学研究\Support%20information.doc#_Toc31833)

[HRMS Spectra of compound **16g** 5](file:///D:\硕士\硕士期间的零碎\论文文献\药物化学研究\Support%20information.doc#_Toc19307)

[HRMS Spectra of compound **16h** 5](file:///D:\硕士\硕士期间的零碎\论文文献\药物化学研究\Support%20information.doc#_Toc23863)

[HRMS Spectra of compound **16i** 5](file:///D:\硕士\硕士期间的零碎\论文文献\药物化学研究\Support%20information.doc#_Toc8422)

[HRMS Spectra of compound **16j** 6](file:///D:\硕士\硕士期间的零碎\论文文献\药物化学研究\Support%20information.doc#_Toc6879)

[HRMS Spectra of compound **16k** 6](file:///D:\硕士\硕士期间的零碎\论文文献\药物化学研究\Support%20information.doc#_Toc16947)

[HRMS Spectra of compound **16l** 6](file:///D:\硕士\硕士期间的零碎\论文文献\药物化学研究\Support%20information.doc#_Toc31204)

[HRMS Spectra of compound **16m** 7](file:///D:\硕士\硕士期间的零碎\论文文献\药物化学研究\Support%20information.doc#_Toc9768)

[HRMS Spectra of compound **16n** 7](file:///D:\硕士\硕士期间的零碎\论文文献\药物化学研究\Support%20information.doc#_Toc26994)

[HRMS Spectra of compound](file:///D:\\硕士\\硕士期间的零碎\\论文文献\\药物化学研究\\Support%20information.doc" \l "_Toc8716) **[16o](file:///D:\\硕士\\硕士期间的零碎\\论文文献\\药物化学研究\\Support%20information.doc" \l "_Toc8716)** [8](file:///D:\\硕士\\硕士期间的零碎\\论文文献\\药物化学研究\\Support%20information.doc" \l "_Toc8716)

[HRMS Spectra of compound](file:///D:\\硕士\\硕士期间的零碎\\论文文献\\药物化学研究\\Support%20information.doc" \l "_Toc8716) **[16p](file:///D:\\硕士\\硕士期间的零碎\\论文文献\\药物化学研究\\Support%20information.doc" \l "_Toc8716)** [8](file:///D:\\硕士\\硕士期间的零碎\\论文文献\\药物化学研究\\Support%20information.doc" \l "_Toc8716)

[HRMS Spectra of compound **16q** 8](file:///D:\硕士\硕士期间的零碎\论文文献\药物化学研究\Support%20information.doc#_Toc8716)

[HRMS Spectra of compound **16r** 9](file:///D:\硕士\硕士期间的零碎\论文文献\药物化学研究\Support%20information.doc#_Toc8716)

[HRMS Spectra of compound **16s** 9](file:///D:\硕士\硕士期间的零碎\论文文献\药物化学研究\Support%20information.doc#_Toc8716)

[HRMS Spectra of compound **16t** 9](file:///D:\硕士\硕士期间的零碎\论文文献\药物化学研究\Support%20information.doc#_Toc8716)

[HRMS Spectra of compound **16u** 10](file:///D:\硕士\硕士期间的零碎\论文文献\药物化学研究\Support%20information.doc#_Toc8716)

[HRMS Spectra of compound **16v** 10](file:///D:\硕士\硕士期间的零碎\论文文献\药物化学研究\Support%20information.doc#_Toc8716)

[HRMS Spectra of compound **16w** 10](file:///D:\硕士\硕士期间的零碎\论文文献\药物化学研究\Support%20information.doc#_Toc8716)


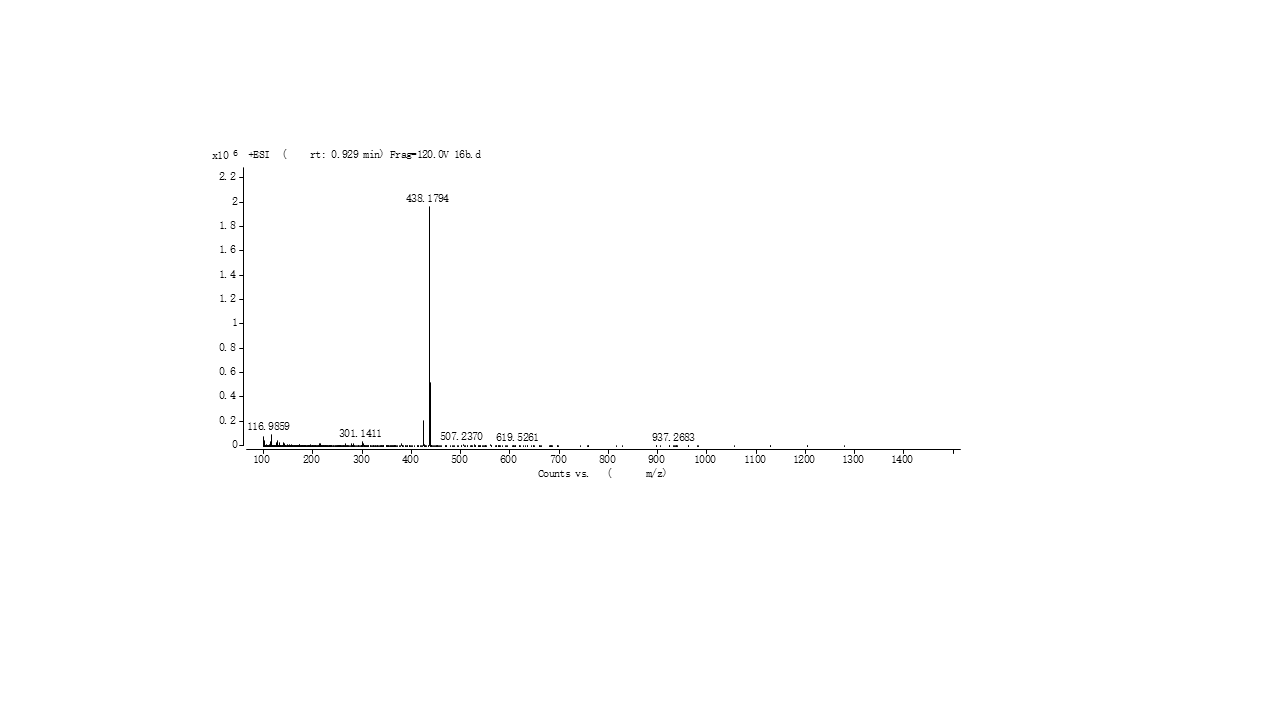

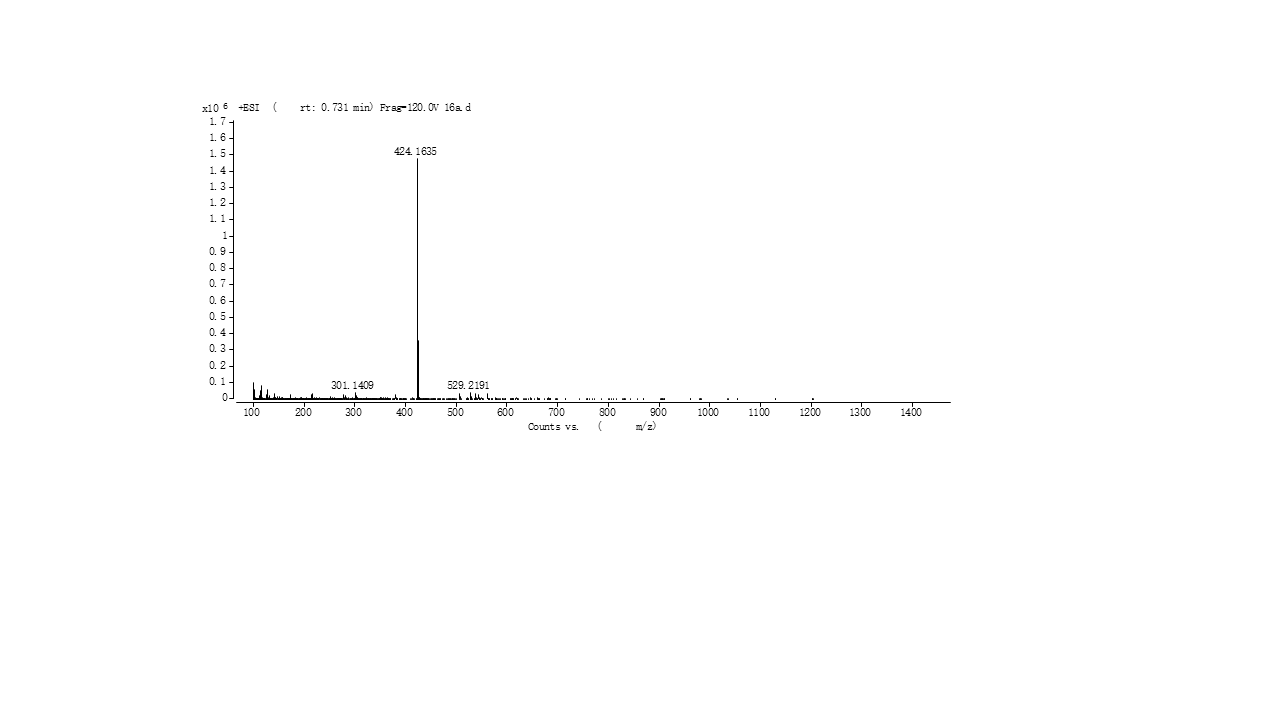
**Fig. S1**  HRMS of spectrum compound **16a**

**
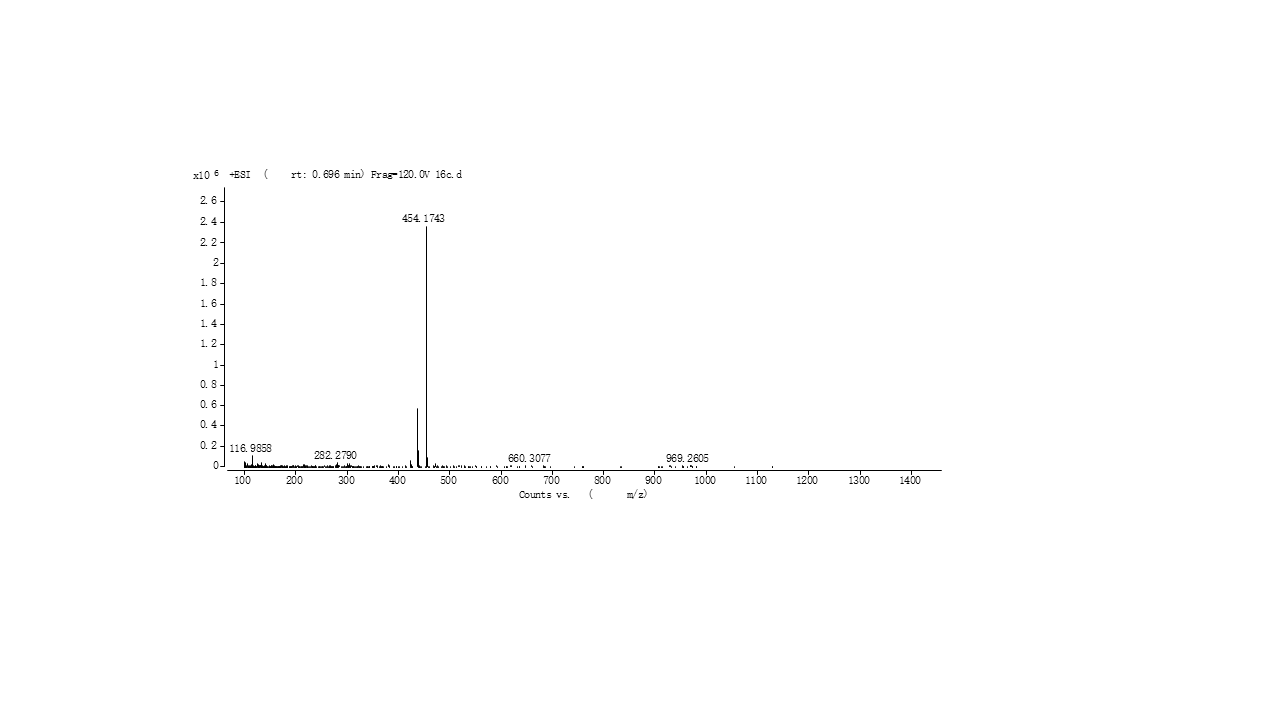
Fig. S2**  HRMS of spectrum compound **16b**

**Fig. S3**  HRMS of spectrum compound **16c**


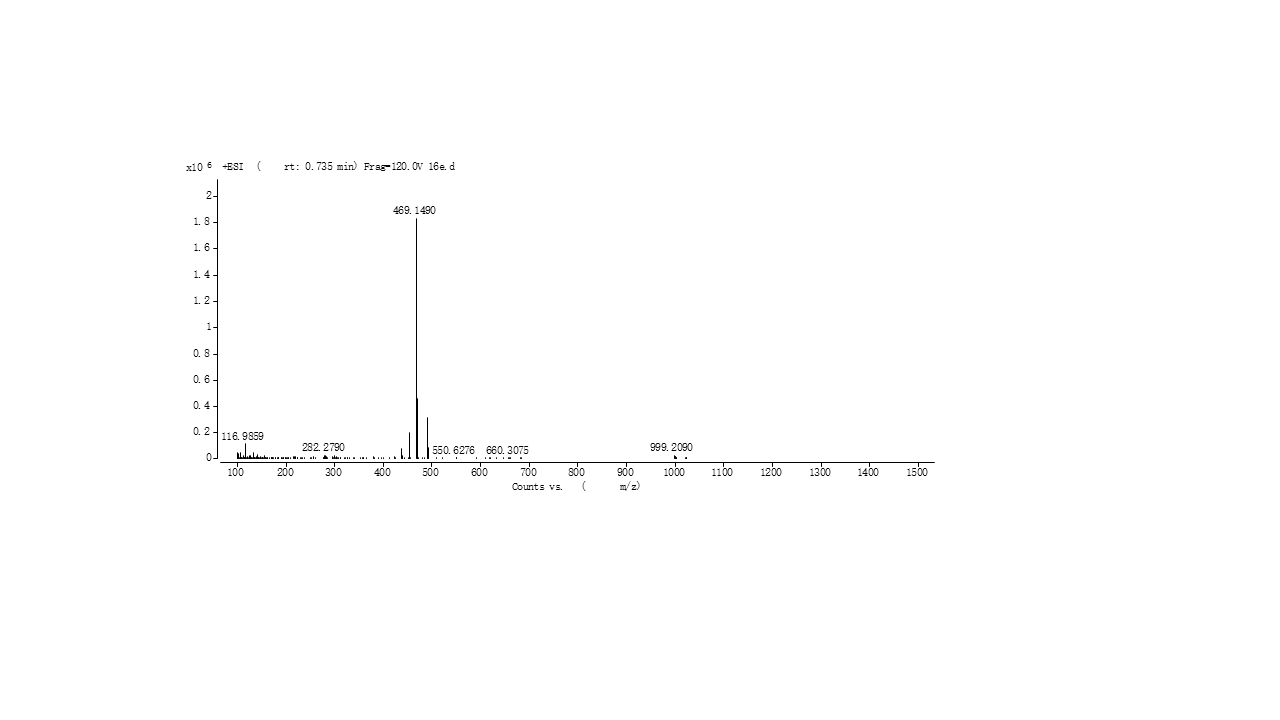

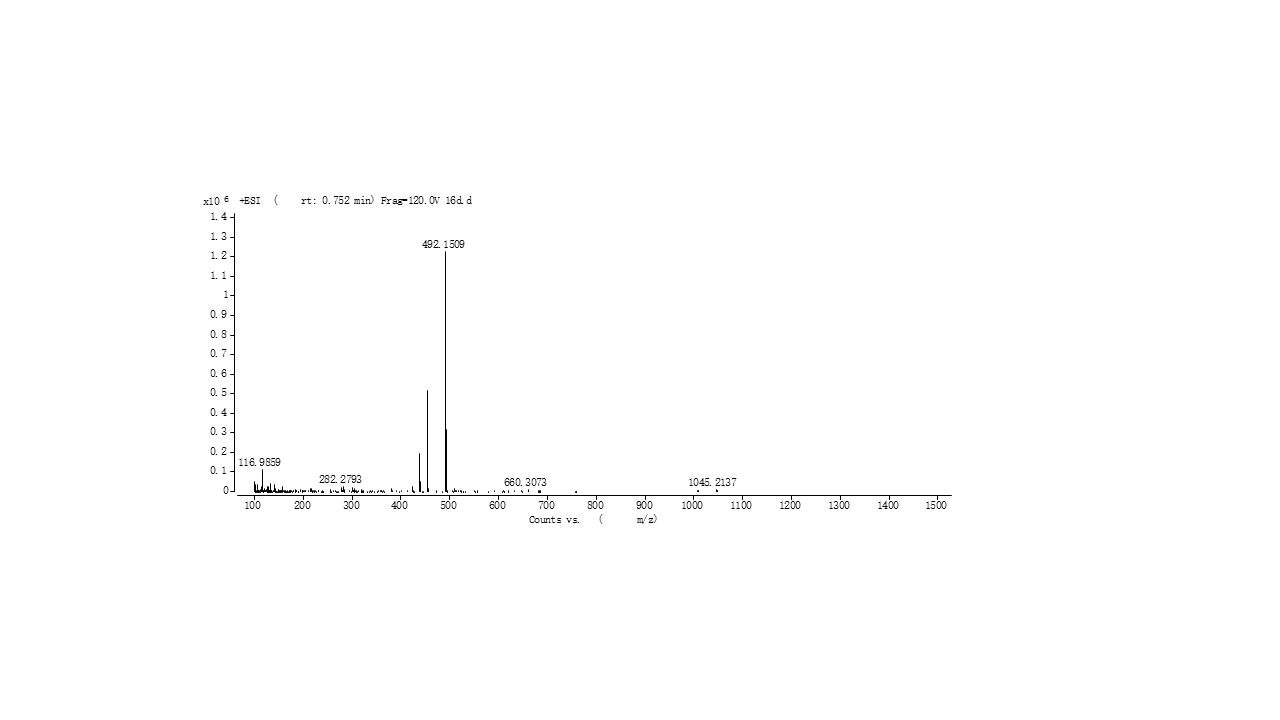
**Fig. S4**  HRMS of spectrum compound **16d**


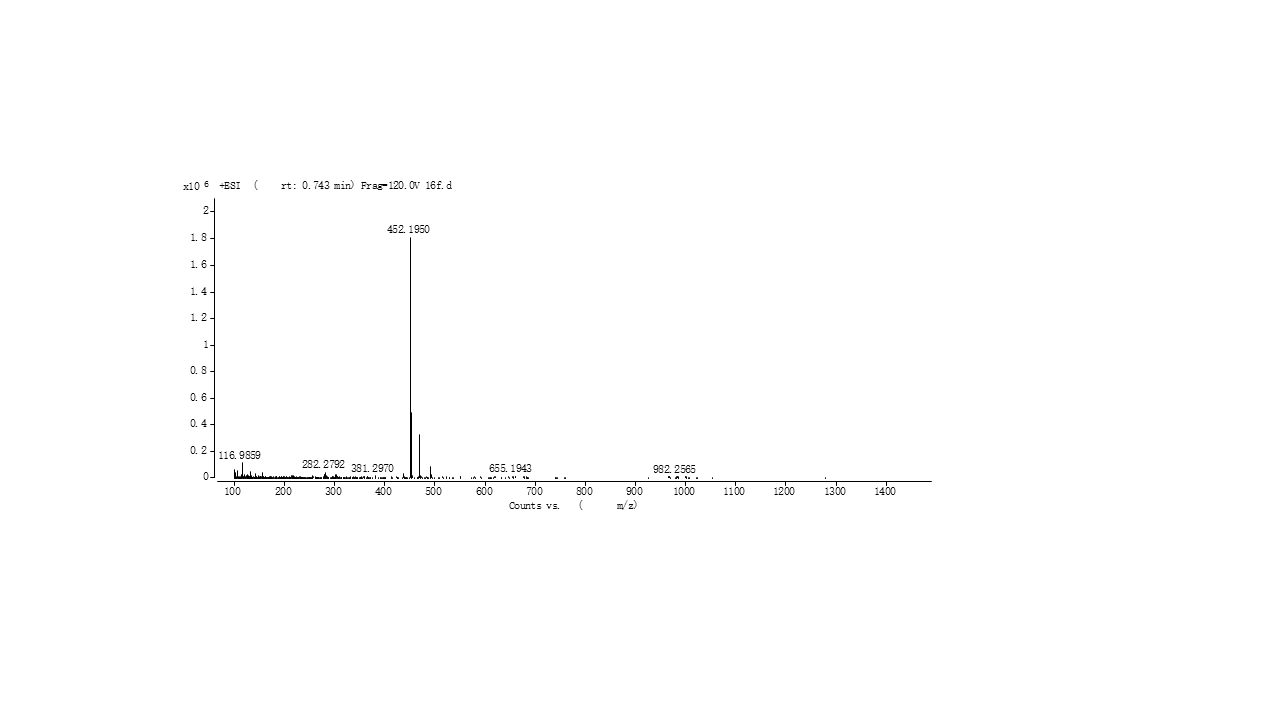
**Fig. S5**  HRMS of spectrum compound **16e**

**Fig. S6**  HRMS of spectrum compound **16f**


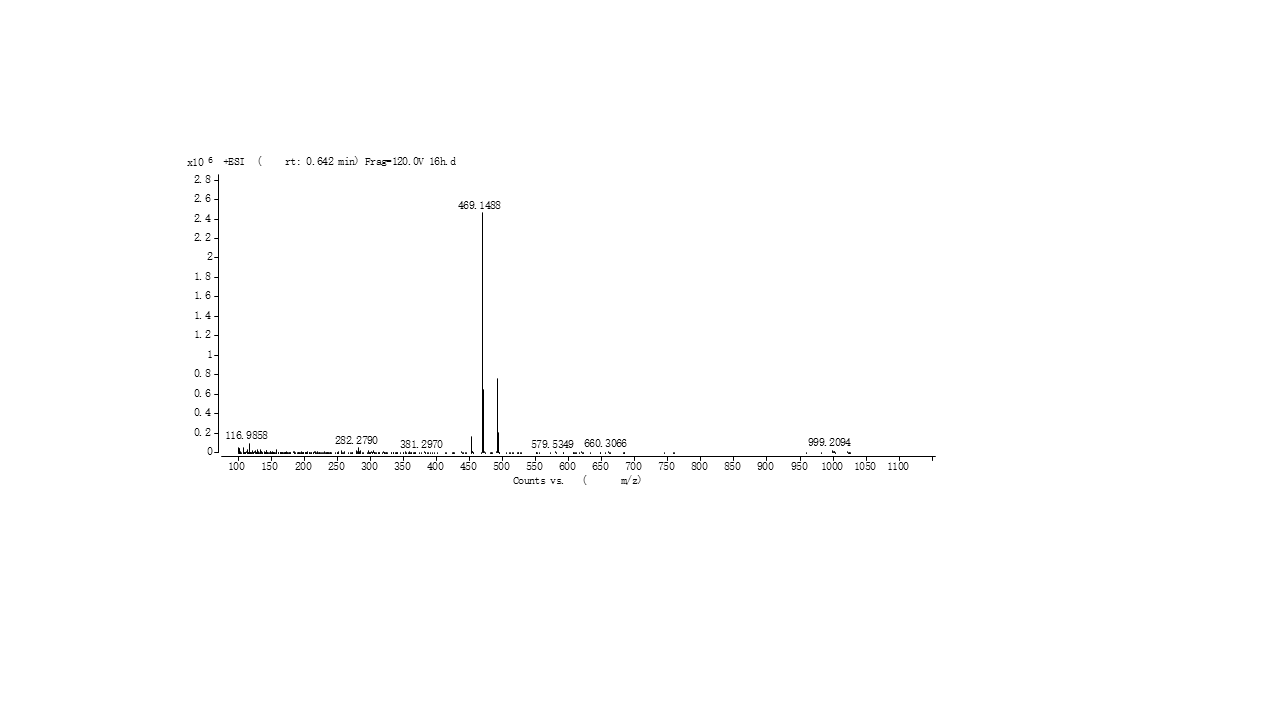

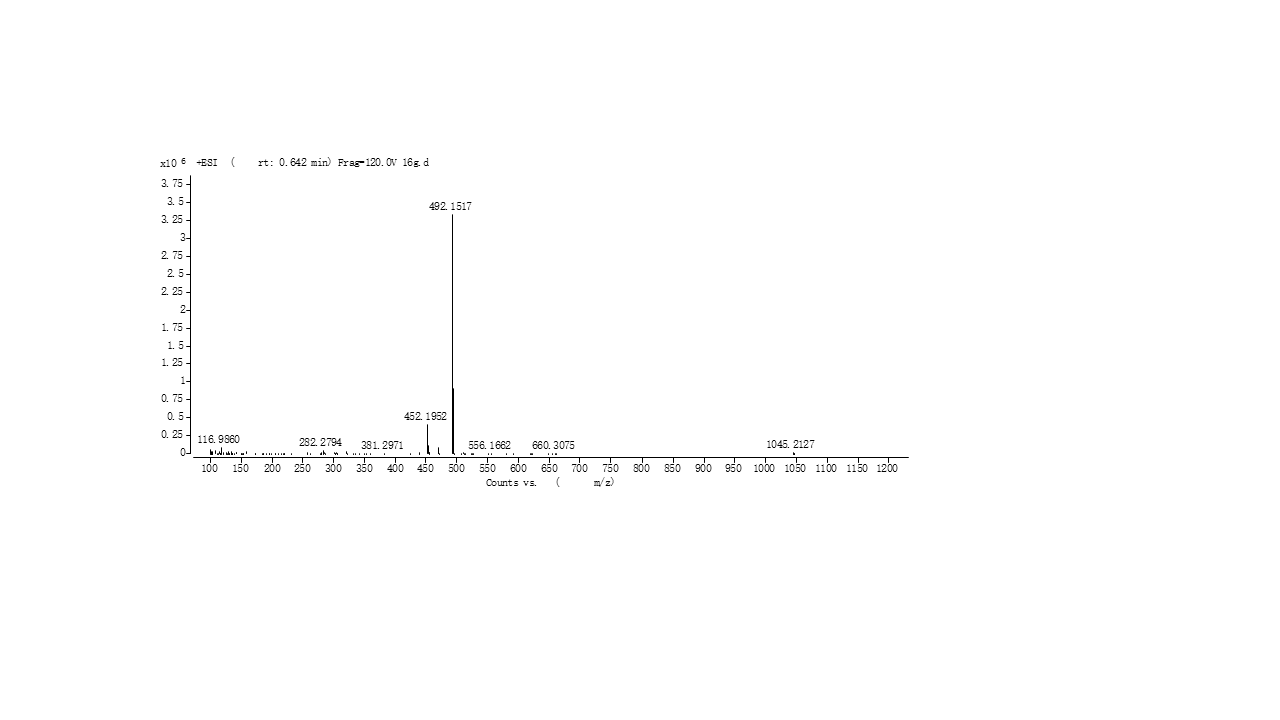
**Fig. S7**  HRMS of spectrum compound **16g**

**
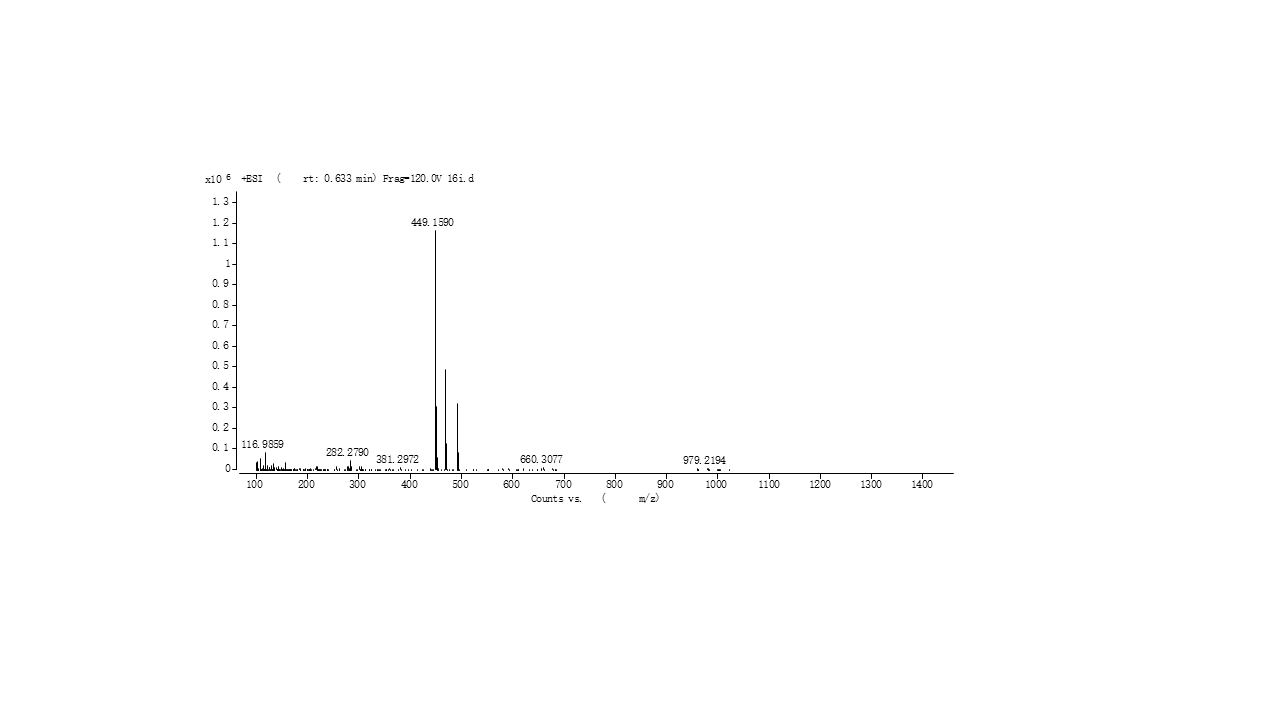
Fig. S8**  HRMS of spectrum compound **16h**

**Fig. S9**  HRMS of spectrum compound **16i**


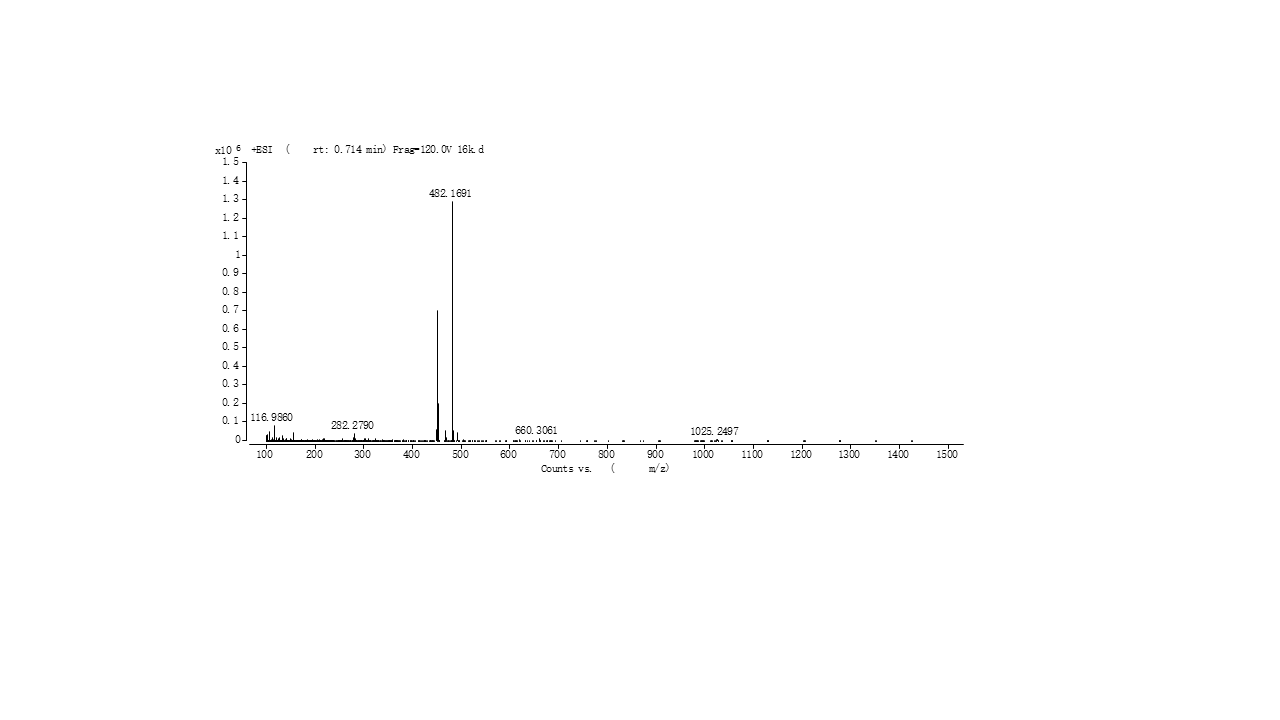

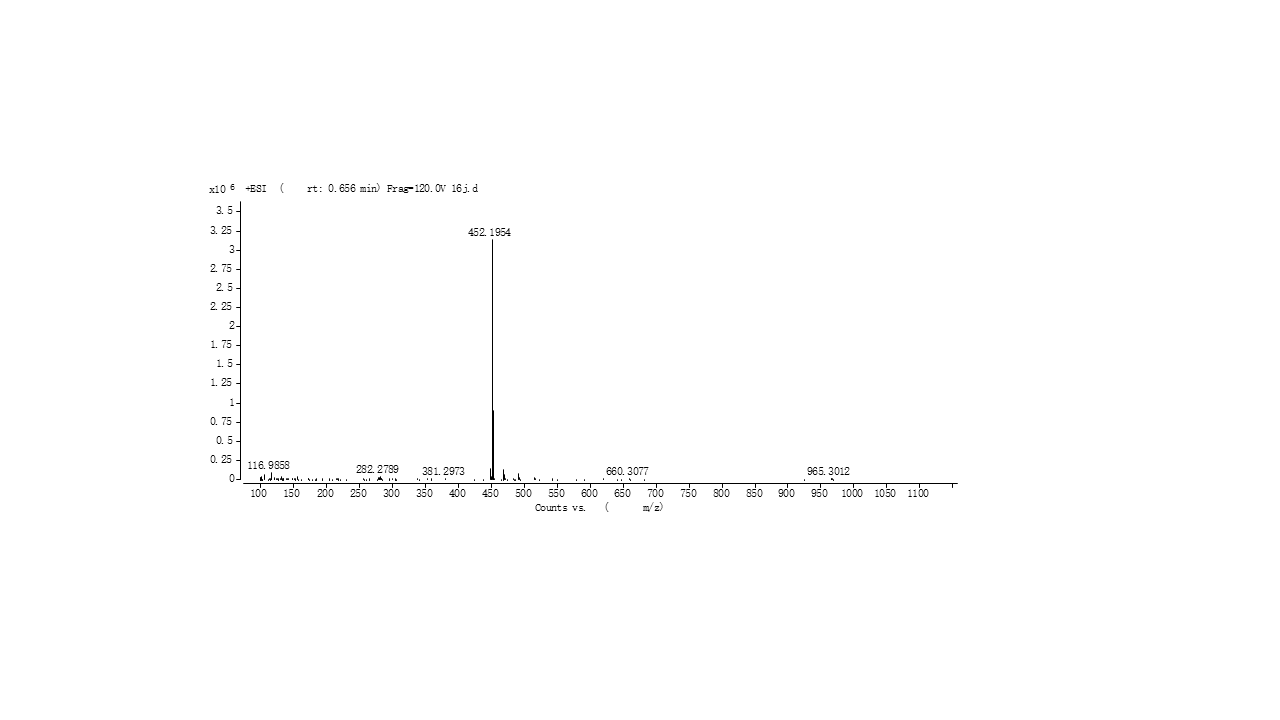
**Fig. S10**  HRMS of spectrum compound **16j**


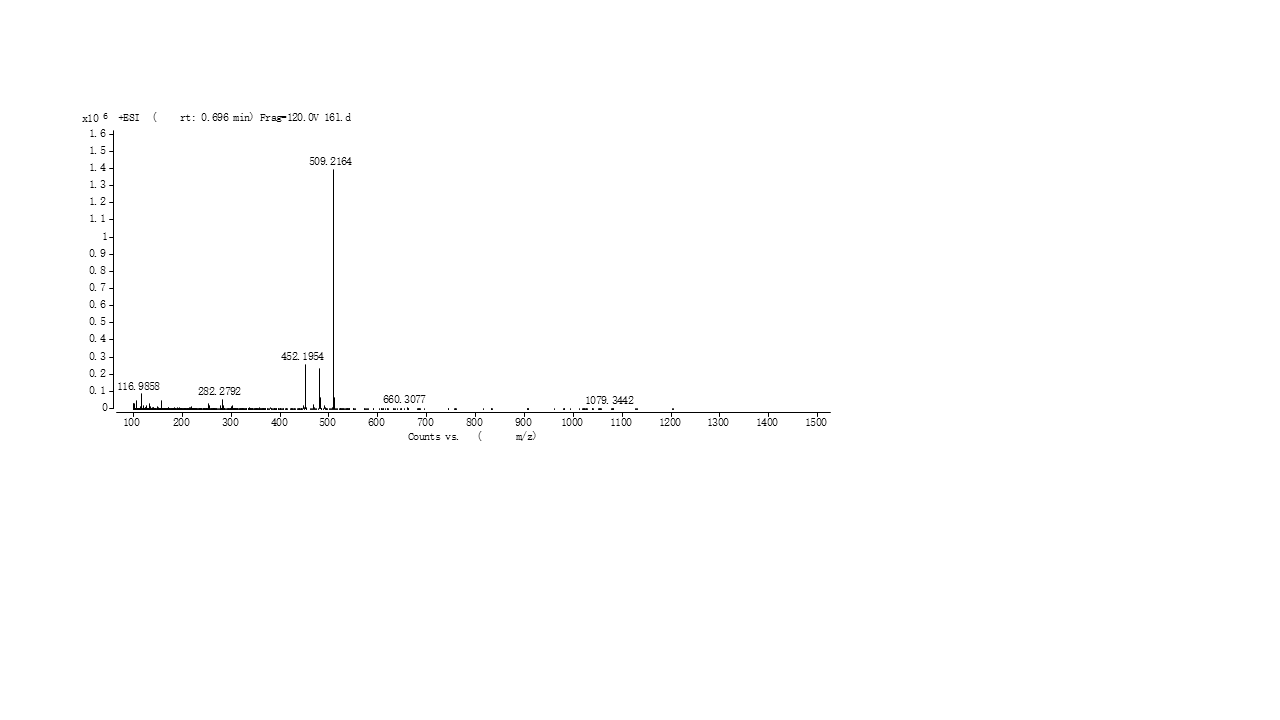
**Fig. S11**  HRMS of spectrum compound **16k**

**Fig. S12**  HRMS of spectrum compound **16l**


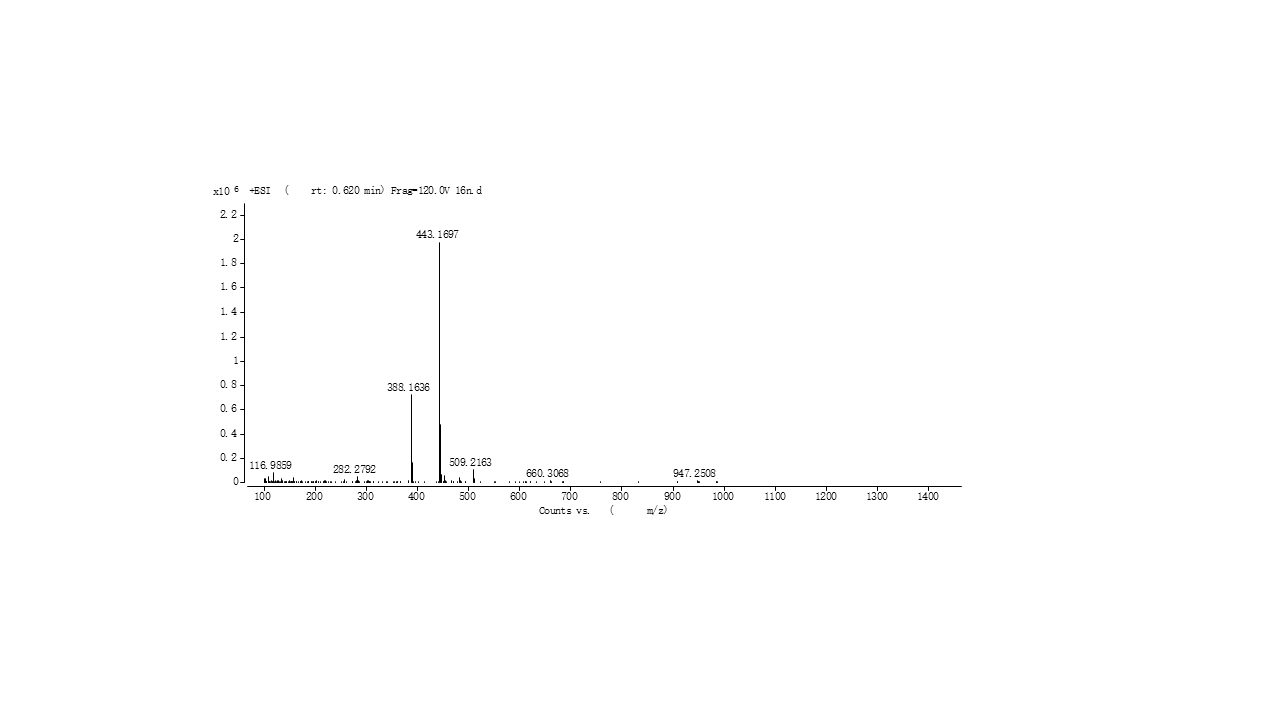

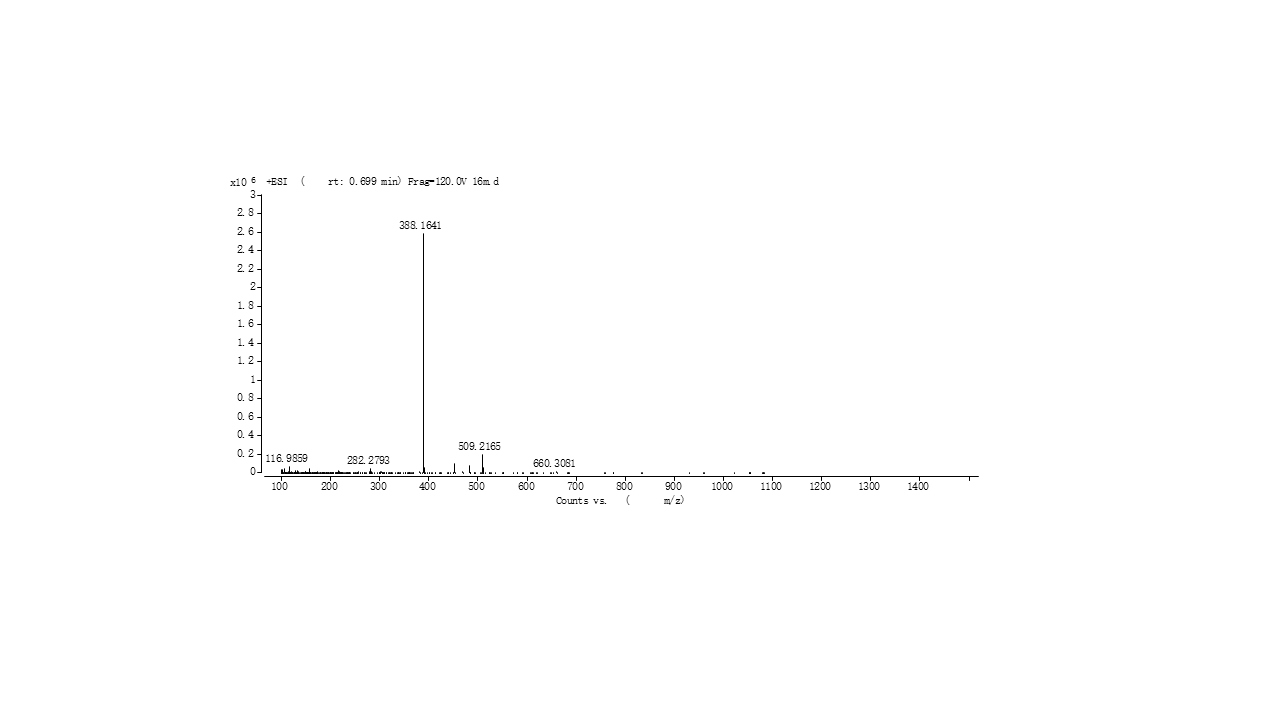
**Fig. S13**  HRMS of spectrum compound **16m**

**Fig. S14**  HRMS of spectrum compound **16n**


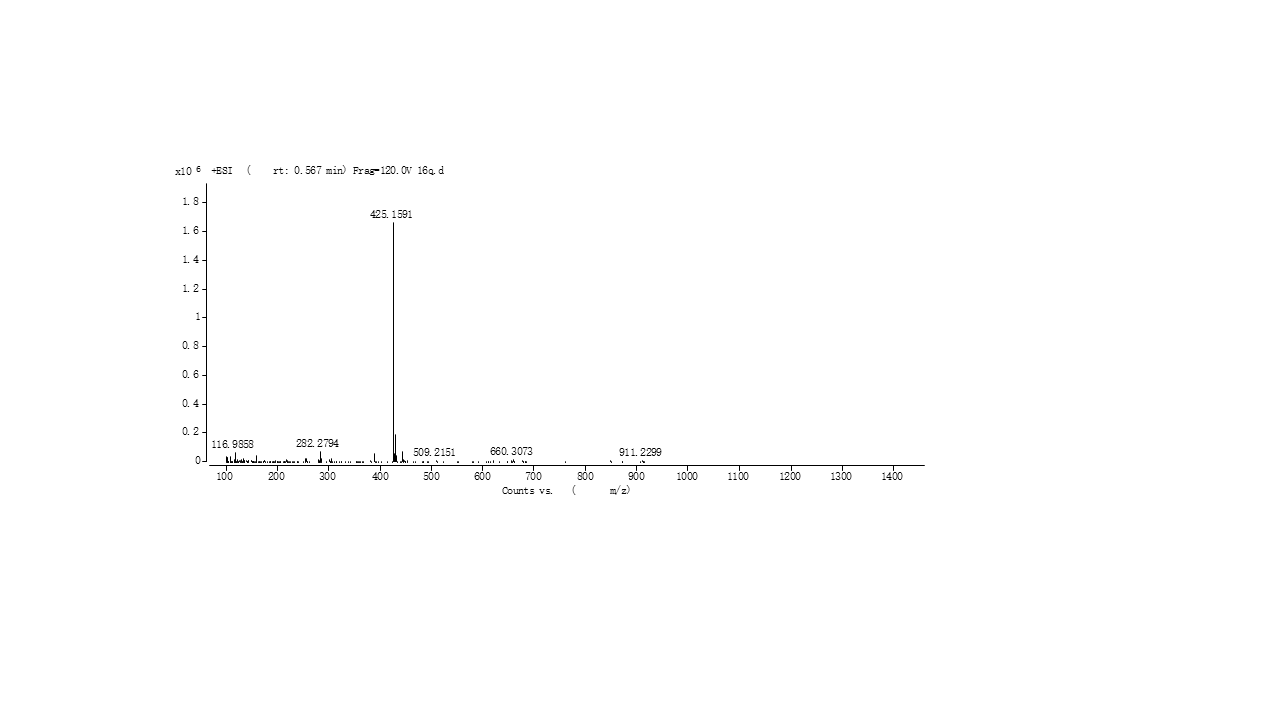

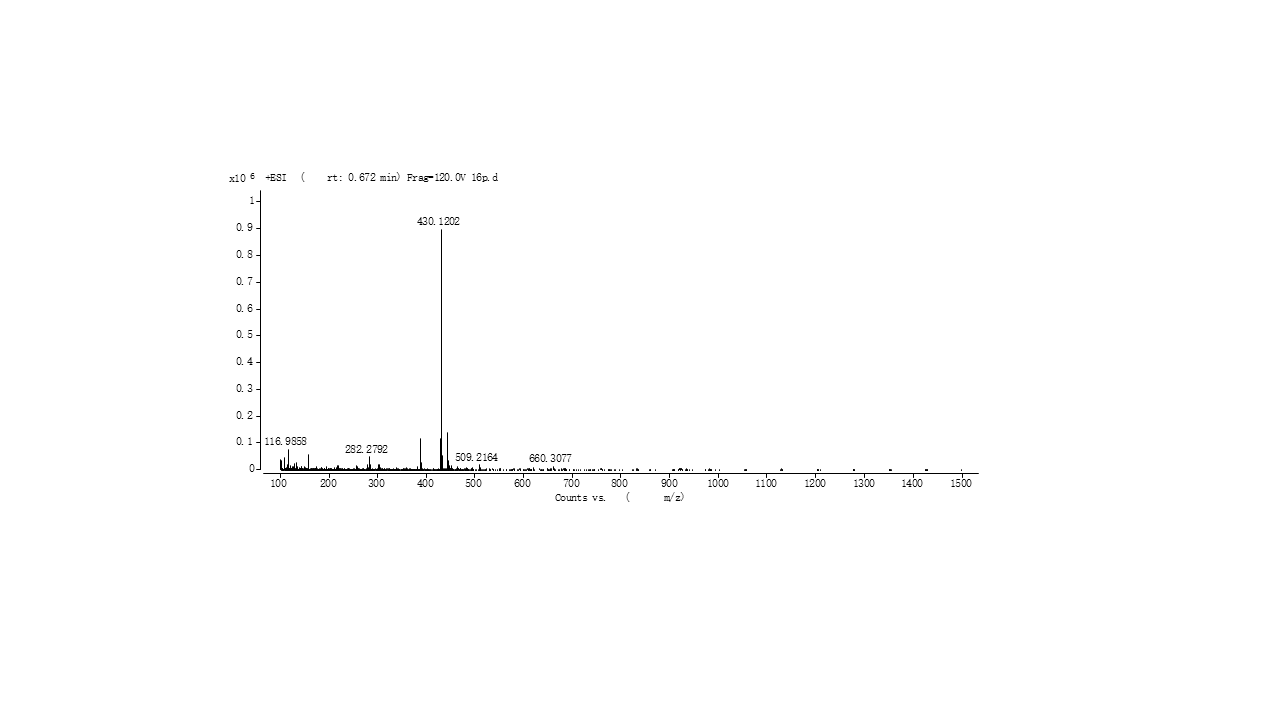
**Fig. S15**  HRMS of spectrum compound **16o**


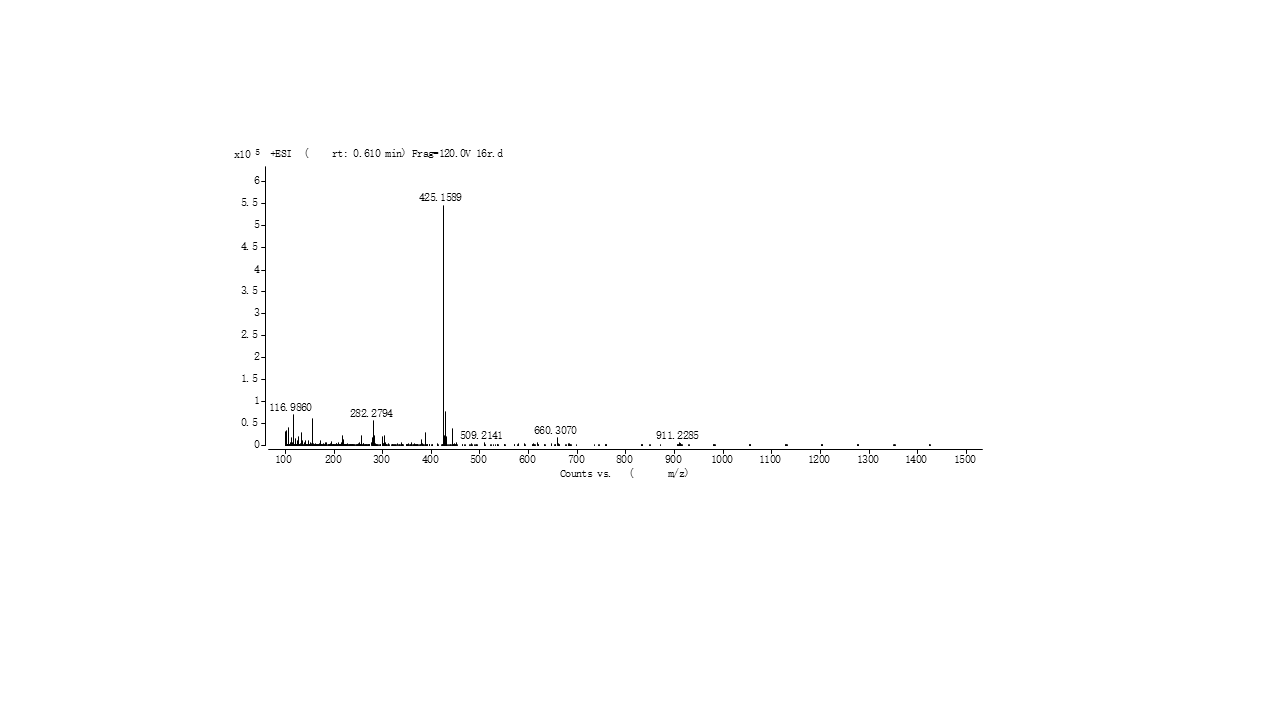
**Fig. S16**  HRMS of spectrum compound **16p**

**Fig. S17**  HRMS of spectrum compound **16q**


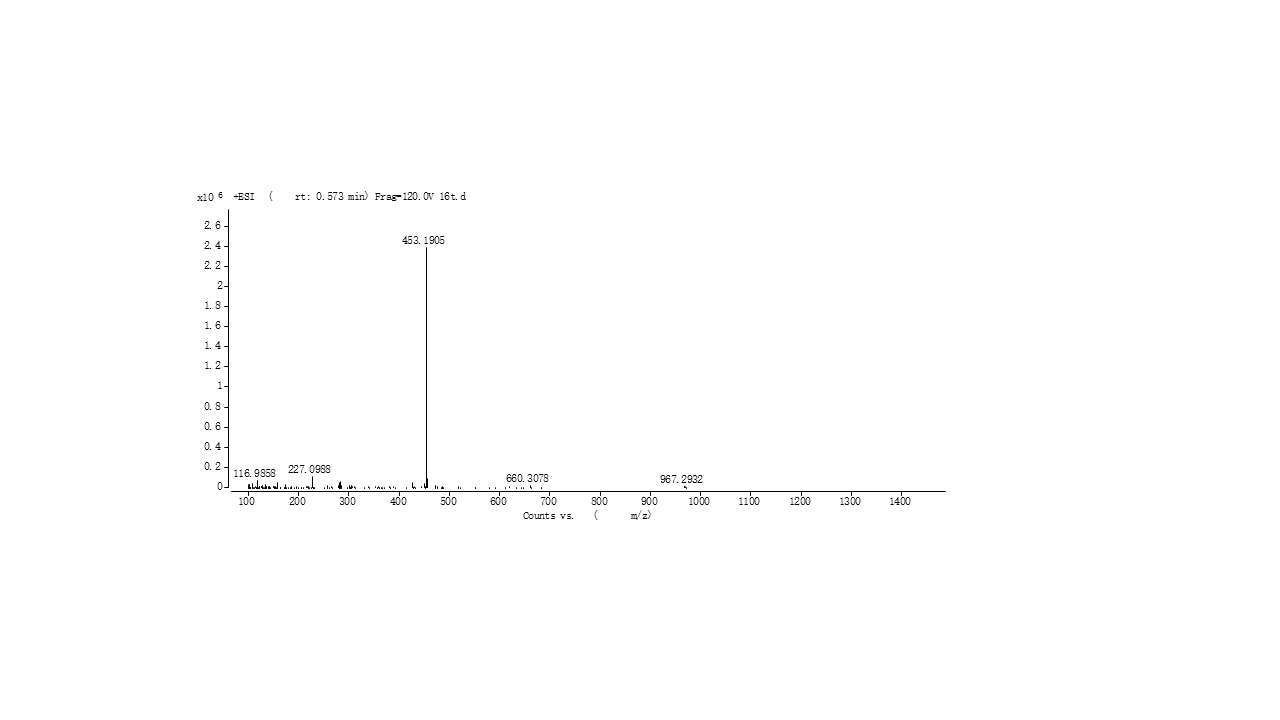

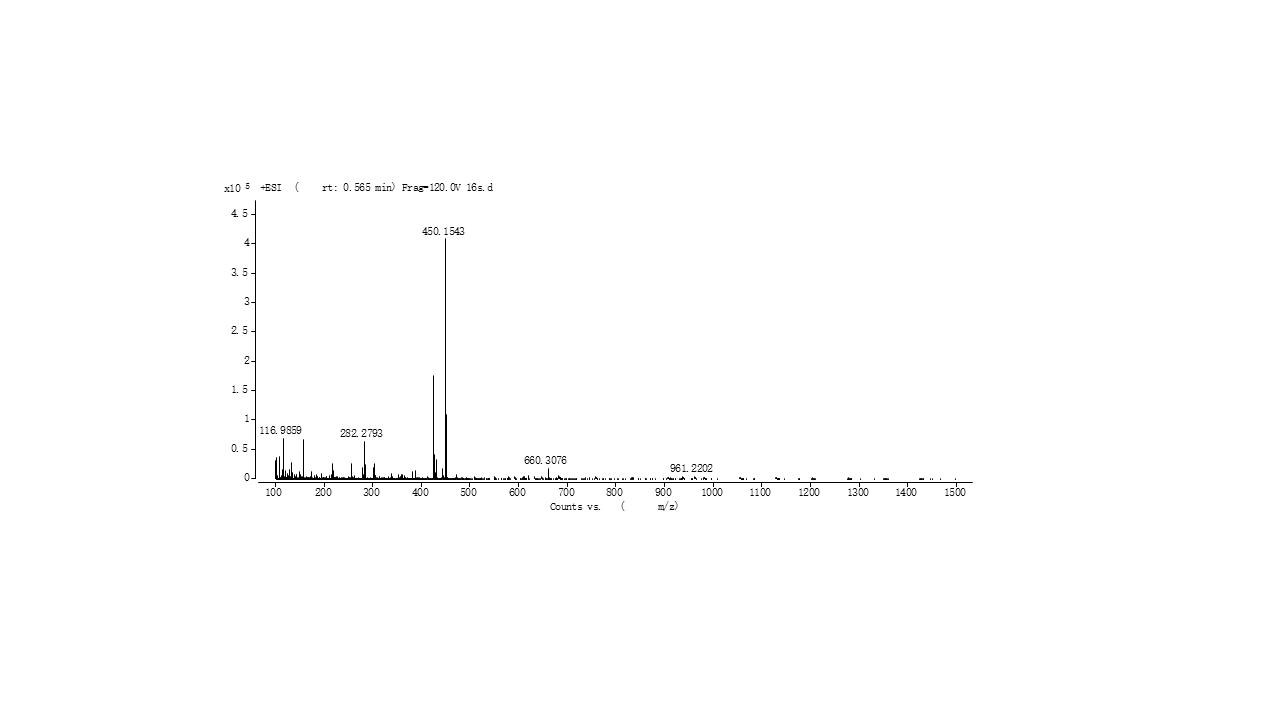
**Fig. S18**  HRMS of spectrum compound **16r**


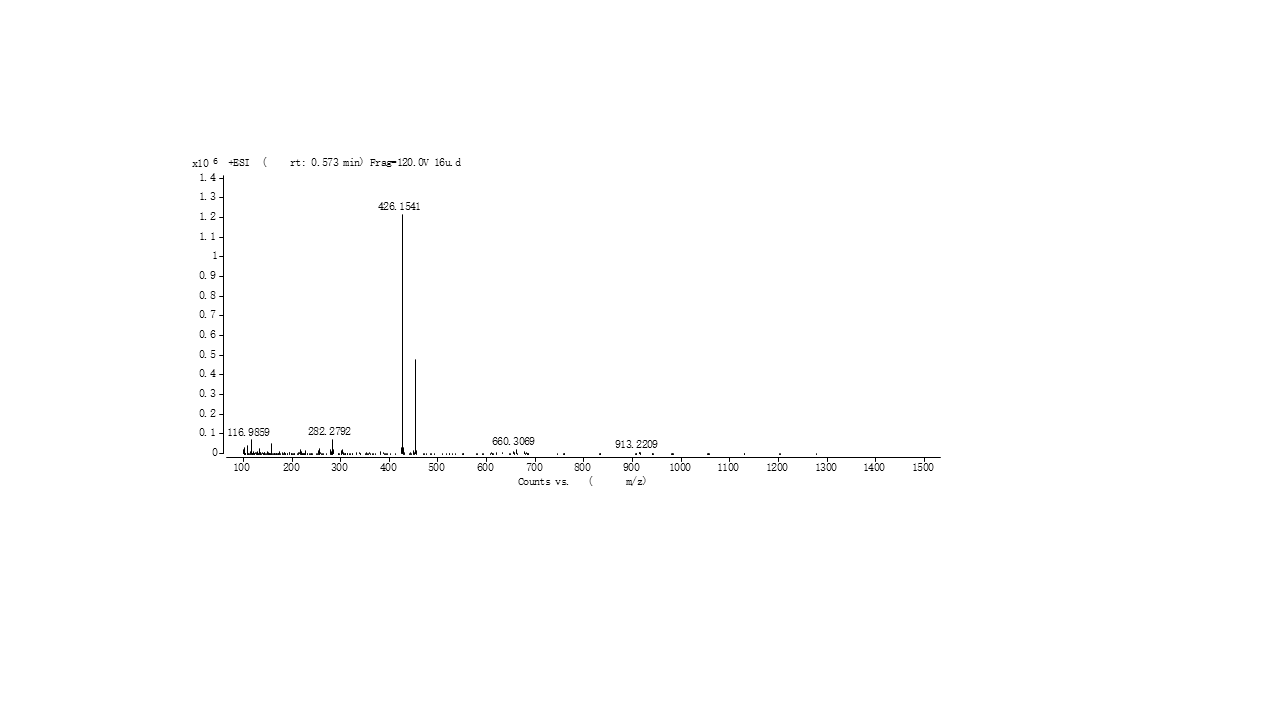
**Fig. S19**  HRMS of spectrum compound **16s**

**Fig. S20**  HRMS of spectrum compound **16t**


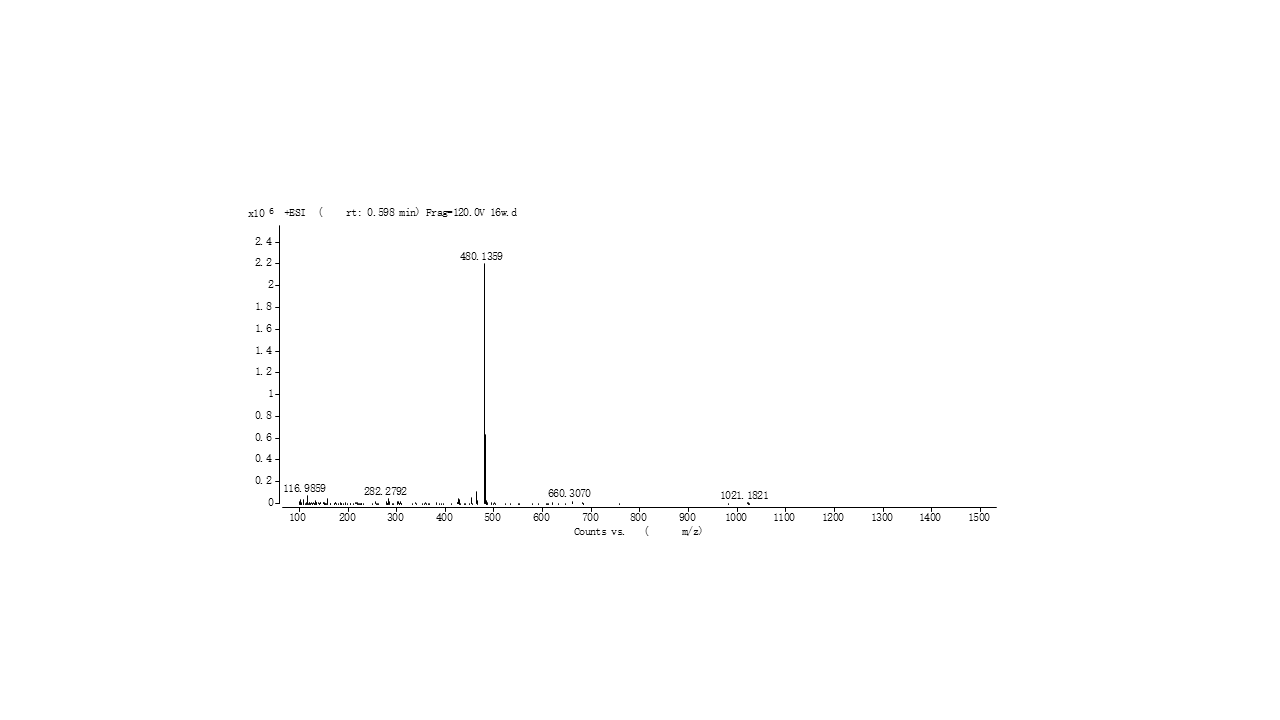

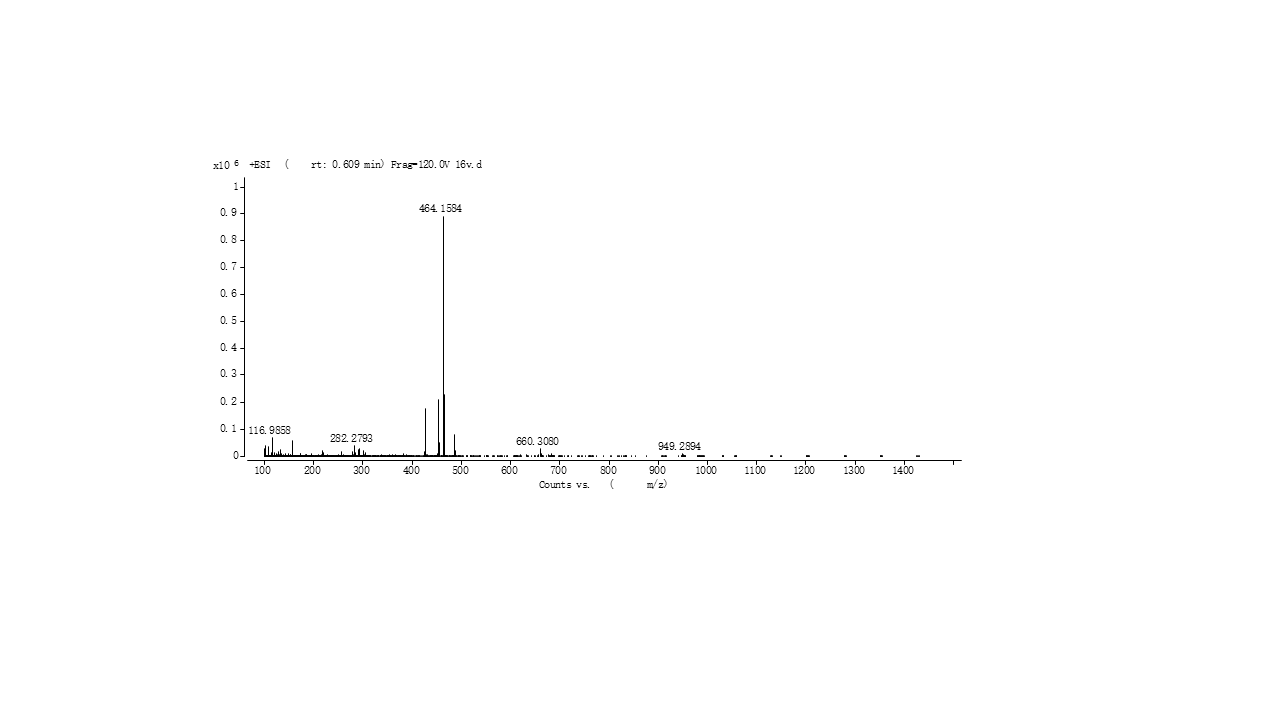
**Fig. S21**  HRMS of spectrum compound **16u**


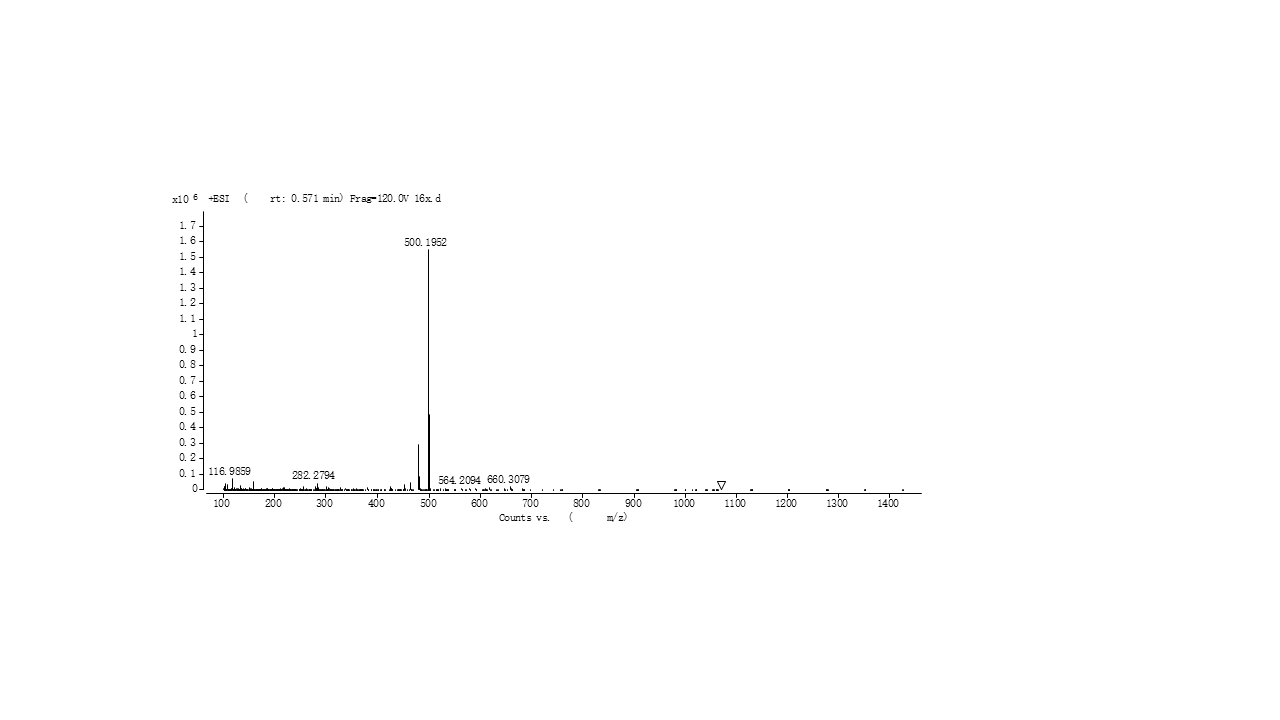
**Fig. S22**  HRMS of spectrum compound **16v**

**Fig. S23**  HRMS of spectrum compound **16w**
